# Supplementary material for: Characterization of a putative grapevine Zn transporter, VvZIP3, suggests its involvement in early reproductive development in Vitis vinifera L
Source: PubMed Central journal article supplement (PMC3432002; doi:10.1186/1471-2229-12-111), 2012-07-23
Supplement: 1471-2229-12-111-S1.pdf [file 1471-2229-12-111-S1.pdf]

## Additional file 1:

NS/S Expression ratio of different ESTs associated to transport.

| EST code         | Function                                                                                       | p-value | NS/S Expression ratio |
|------------------|------------------------------------------------------------------------------------------------|---------|-----------------------|
| VVCCGC1046C09.g  | Homologue to aquaporin [Vitis vinifera]                                                        | 0.0002  | 8.79                  |
| VVCCGS1050B10.g  | Similar to putative Na <sup>+</sup> /H <sup>+</sup> -exchanging protein [Arabidopsis thaliana] | 0.0163  | 7.38                  |
| VVCCGS1066B01.g  | Homologue to ABC-type Fe <sup>3+</sup> transport system [Pseudomonas fluorescens PfO-1]        | 0.0006  | 6.12                  |
| VVCCGC2021A03.b  | Similar to putative amino acid carrier [Oryza sativa (japonica cultivar-group)]                | 0.0195  | 4.82                  |
| VVCCGC1054H10.g  | Homologue to putative aquaporin PIP1-1 [Vitis berlandieri x Vitis rupestris]                   | 0.0005  | 3.63                  |
| VVCCGC3021C01.b  | Homologue to putative aquaporin [Vitis vinifera]                                               | 0.0063  | 3.35                  |
| VVCCGC3048C02.b  | Homologue to putative aquaporin PIP2-2 [Vitis berlandieri x Vitis rupestris]                   | 0.0104  | 2.95                  |
| VVCCGS1063D10.g  | Similar to sulfate transporter [Arabidopsis thaliana], partial                                 | 0.0052  | 2.69                  |
| VVCCGC2069C05.b1 | Similar to outward-rectifying potassium channel KCO1 [Eucalyptus camaldulensis]                | 0.0262  | 2.48                  |
| VVCCGC3050D04.b  | Similar to ammonium transporter (AMT1.1) [Lotus corniculatus var. japonicus]                   | 0.0324  | 2.20                  |
| VVCCGS1044E03.g  | Homologue to putative sucrose transporter [Vitis vinifera]                                     | 0.0054  | 1.69                  |
| VVCCGS1061E01.g  | Similar to metal transporter, putative (ZIP4) [Arabidopsis thaliana]                           | 0.0206  | 1.54                  |
| VVCCGC1059G04.g  | Similar to aquaporin [Vitis vinifera]                                                          | 0.0056  | 1.42                  |
| VVCCGS2246F08.b  | Similar to putative copper-transporting P-type ATPase [Oryza sativa (japonica cultivar-group)] | 0.0096  | 0.56                  |
| VVCCGC1009E07.g  | Homologue to putative aquaporin PIP1-3 [Vitis berlandieri x Vitis rupestris]                   | 0.0376  | 0.51                  |
| VVCCGC1029A05.g  | Similar to sulfate transporter-like protein [Oryza sativa (japonica cultivar-group)]           | 0.0046  | 0.48                  |
| VVCCGS2225E04.b  | Similar to putative aquaporin TIP3 [Vitis berlandieri x Vitis rupestris]                       | 0.0026  | 0.36                  |
| VVCCGS1028B01.g  | Homologue to aquaporin [Vitis vinifera]                                                        | 0.0142  | 0.24                  |
| VVCCGS2204F01.b  | Homologue to aquaporin [Vitis vinifera]                                                        | 0.0239  | 0.23                  |
| VVCCGC1012H02.g  | Similar to putative permease 1 [Arabidopsis thaliana]                                          | 0.0099  | 0.23                  |
| VVCCGC1071D08.g  | Similar to metal transport protein [Medicago truncatula]                                       | 0.0079  | 0.19                  |
| VVCCGS1028A01.g  | Similar to phosphate transporter [Lycopersicon esculentum]                                     | <.0001  | 0.18                  |
| VVCCGS1027H10.g  | Similar to ABC transporter [Gossypium hirsutum]                                                | 0.0131  | 0.18                  |
| VVCCGS1009B03.g  | Similar to boron transporter [Oryza sativa (japonica cultivar-group)]                          | 0.0208  | 0.16                  |
| VVCCGS1006G05.g  | Similar to metal transport protein [Medicago truncatula]                                       | 0.0049  | 0.14                  |
| VVCCGS2230B05.b  | Similar to putative anthocyanin permease [Lycopersicon esculentum]                             | 0.0057  | 0.04                  |

Putative genes associated to transport that showing a significant expression variation (p-value < 0.05) from expression libraries from parthenocarpic (NS) and normal (S) *Vitis vinifera* cv. carménère berries (DEGECHIVID database; www.genomicafrutos.cl).
